# Supplementary material
Source: publisher site journal article supplement (https://www.dovepress.com/article/237420)
Supplement: Supplementary file 1 [file get_supplementary_file.php]

**Supplementary Materials**

**Compound 1**


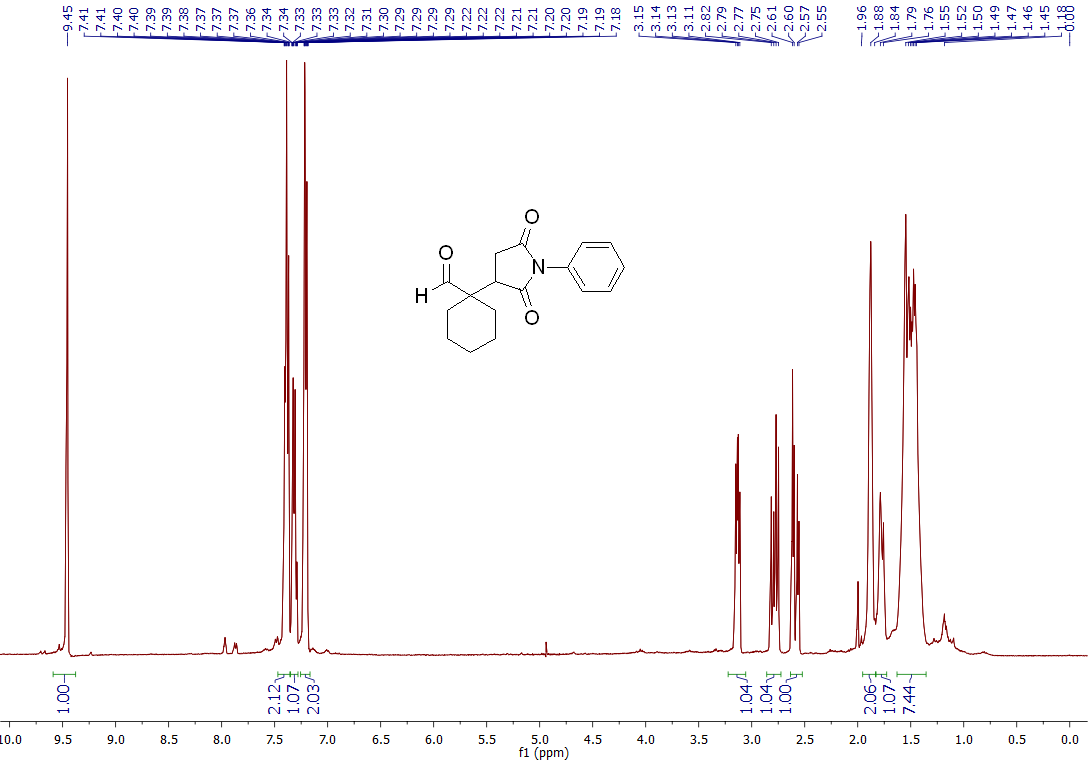


**Figure S1:** 1H NMR spectrum of 1-(2,5-dioxo-1-phenylpyrrolidin-3-yl)cyclohexane-1-carbaldehyde.


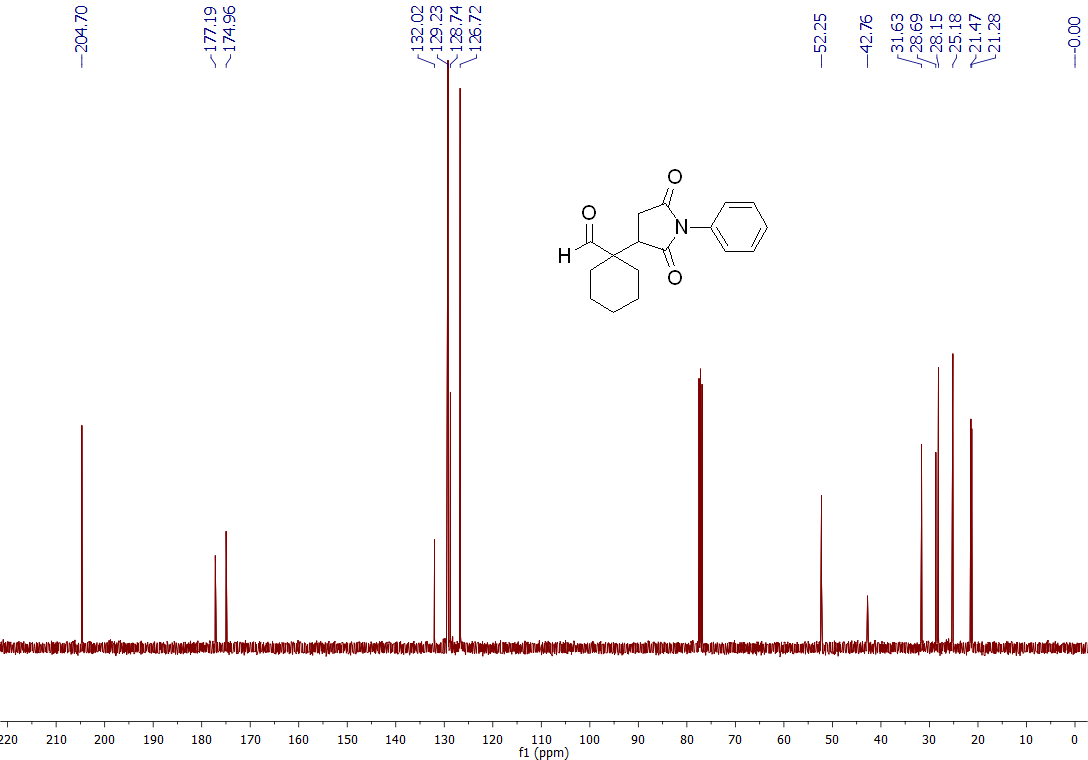


**Figure S2:** 13C NMR spectrum of 1-(2,5-dioxo-1-phenylpyrrolidin-3-yl)cyclohexane-1-carbaldehyde.

**Compound 2**


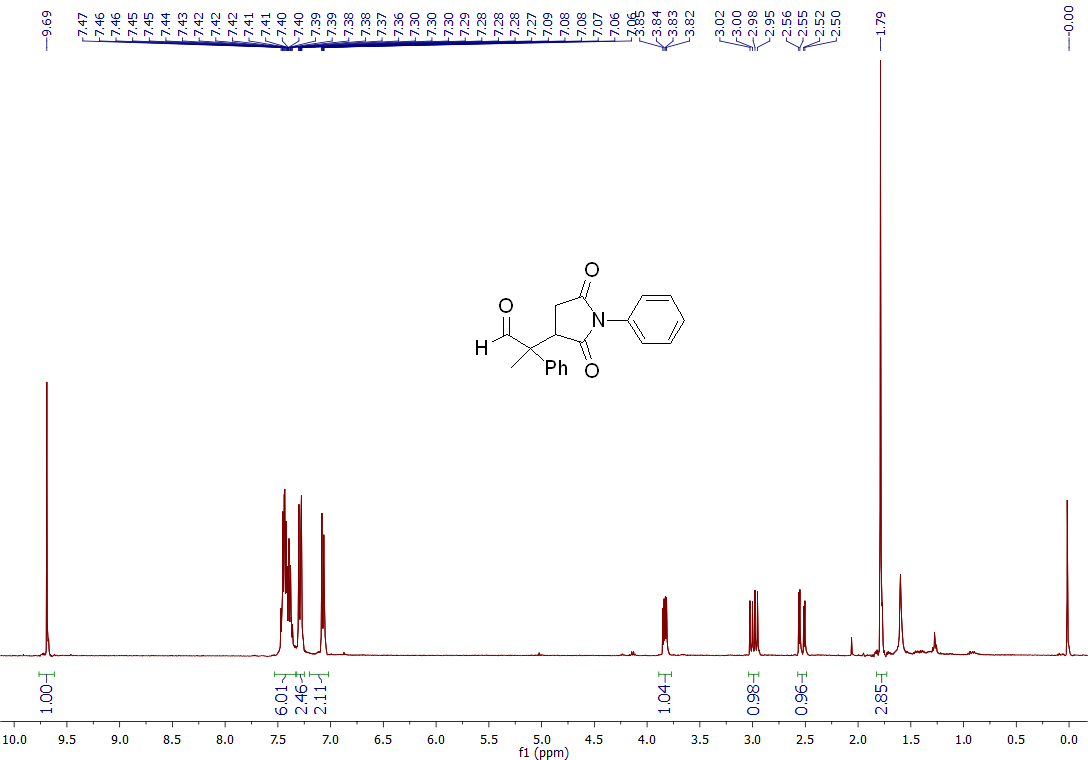


**Figure S3:** 1H NMR spectrum of 2-(2,5-dioxo-1-phenylpyrrolidin-3-yl)-2-phenylpropanal.


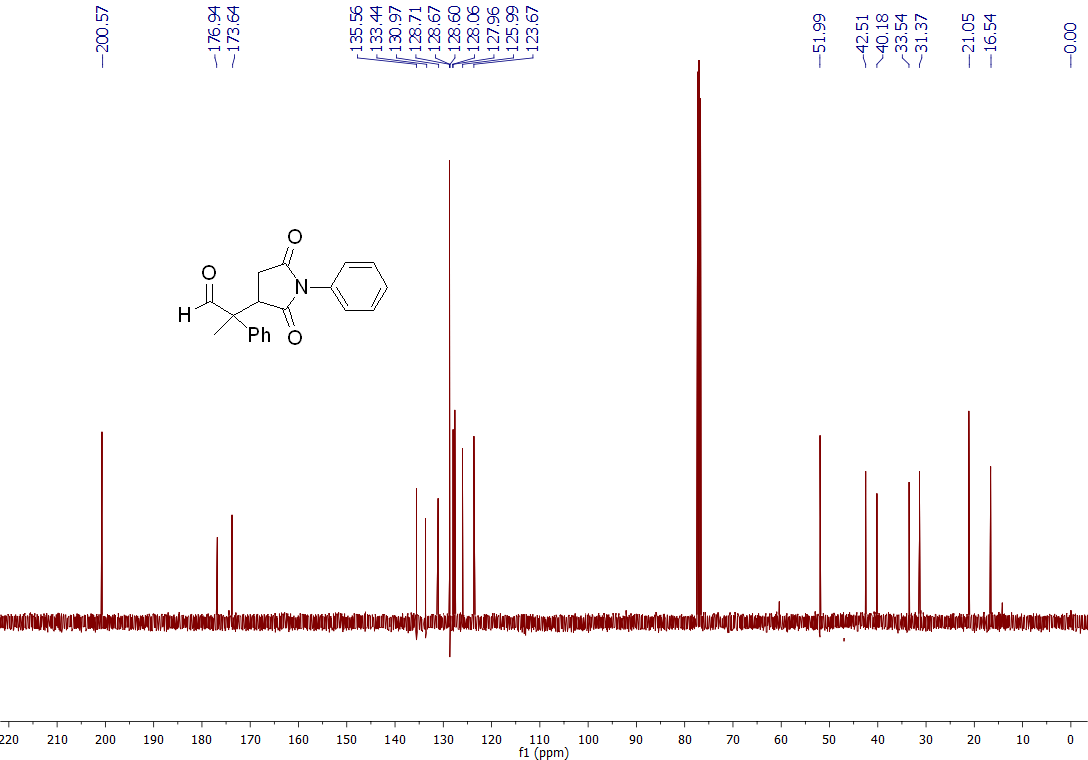


**Figure S4:** 13C NMR spectrum of 2-(2,5-dioxo-1-phenylpyrrolidin-3-yl)-2-phenylpropanal.
